# Supplementary material for: Self-assembly of a terbium(III) 1D coordination polymer on mica
Source: publisher site journal article supplement (doi:10.3762/bjnano.10.234), 2019-12-10
Supplement: Additional file 1 [file 2190-4286-10-234-S1.pdf]

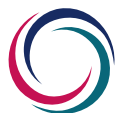

## Supporting Information

for

### **Self-assembly of a terbium(III) 1D coordination polymer on mica**

Quentin Evrard, Giuseppe Cucinotta, Felix Houard, Guillaume Calvez, Yan Suffren, Carole Daiguebonne, Olivier Guillou, Andrea Caneschi, Matteo Mannini and Kevin Bernot

*Beilstein J. Nanotechnol.* **2019**, *10*, 2440–2448. doi:10.3762/bjnano.10.234

### **Additional magnetic measurements data**

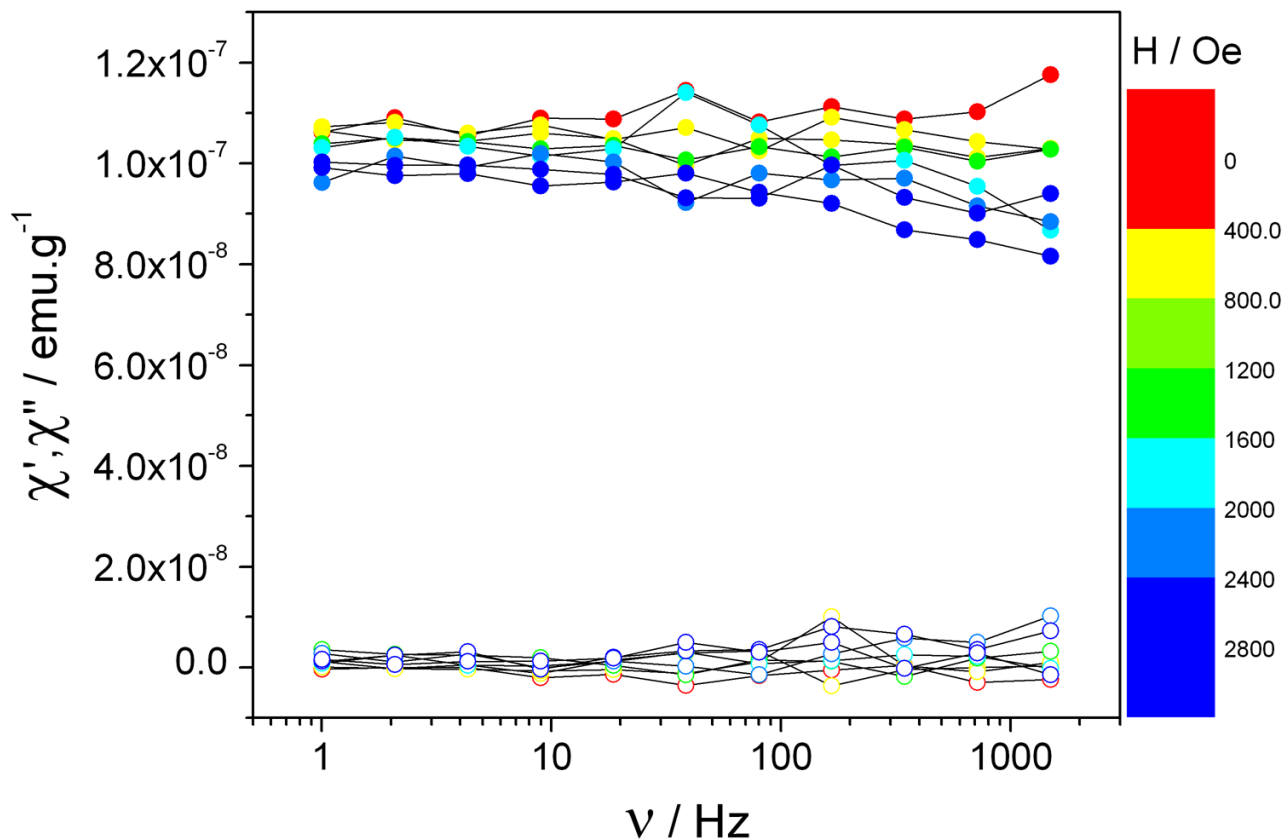

**Figure S1:** Frequency dependence of the in-phase component of the magnetization ( $\chi'$ , filled circles) and the out-of-phase component of the magnetization ( $\chi''$ , open circles) of the mica substrate (11.9 mg) measured at 2 K for static fields from 0 Oe (red) to 6400 Oe (blue). On this basis, substrate contributions of  $\chi' = 1 \times 10^{-7} \text{emu}\cdot\text{g}^{-1}$  and  $\chi'' = 0 \text{emu}\cdot\text{g}^{-1}$  have been considered for the measurements of the deposits.

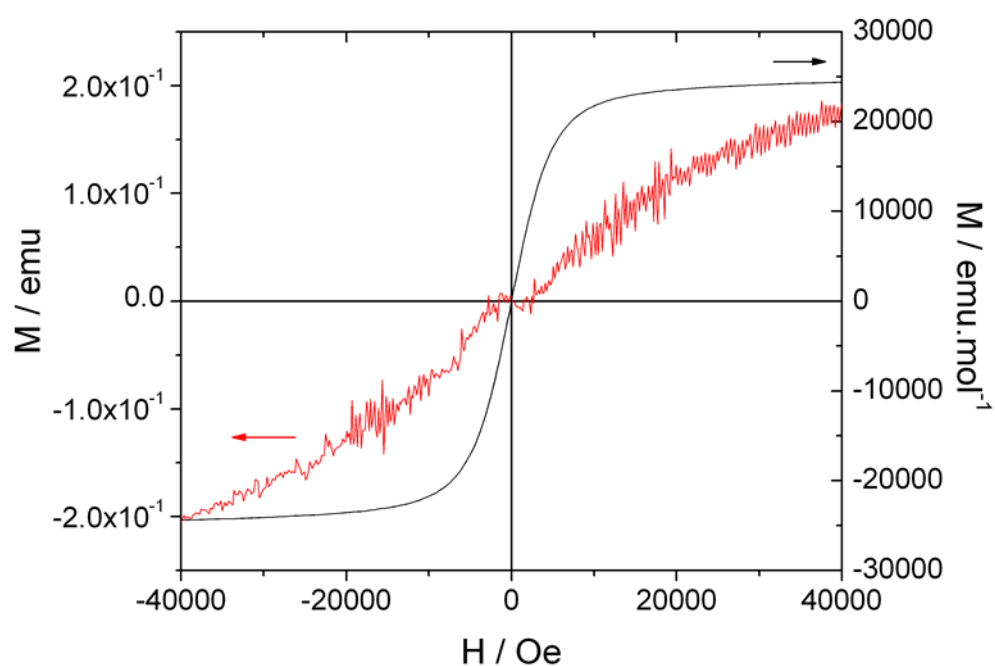

**Figure S2:** Comparison of the magnetization curves measured at 1.8 K on the bulk material  $[\text{Tb}(\text{hfac})_3 \cdot 2\text{H}_2\text{O}]_n$  (black line, right scale) and on the deposits  $[\text{Tb}(\text{hfac})_3 \cdot 2\text{H}_2\text{O}]_n @ \text{mica}$  (red line, left scale, contribution of the mica substrate subtracted).

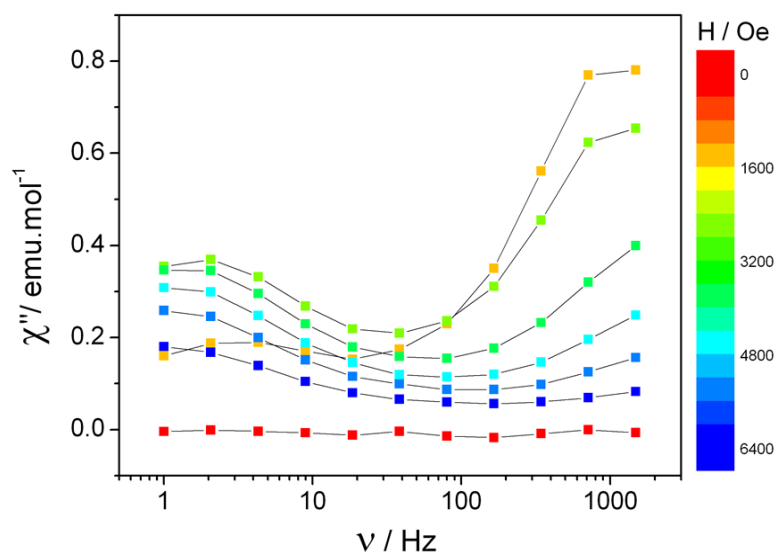

**Figure S3:** Frequency dependence of the out-of-phase component of the magnetization ( $\chi''$ ) of  $[\text{Tb}(\text{hfac})_3 \cdot 2\text{H}_2\text{O}]_n$  measured at 2 K for static fields from 0 Oe (red) to 6400 Oe (blue).

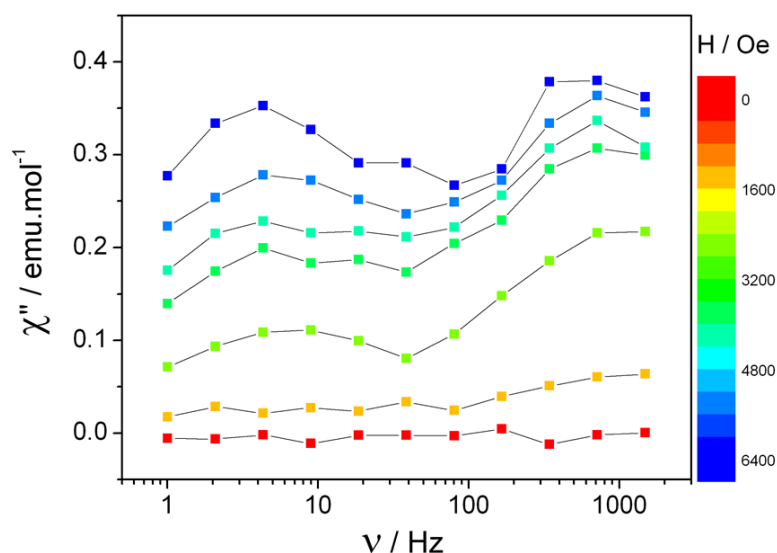

**Figure S4:** Frequency dependence of the out-of-phase component of the magnetization ( $\chi''$ ) of  $[\text{Tb}(\text{hfac})_3 \cdot 2\text{H}_2\text{O}]_n@\text{mica}$  measured at 2 K for static fields from 0 Oe (red) to 6400 Oe (blue). The values in  $\text{emu} \cdot \text{g}^{-1}$  are calculated considering an estimated weight of the deposit of 1.53 ng as obtained from the comparison of the  $\chi'$  values with the ones measured for the bulk sample. Contributions of the mica substrate have been subtracted.
